# Supplementary material for: Fabricating biodegradable calcium phosphate/calcium sulfate cement reinforced with cellulose:in vitroandin vivostudies
Source: Royal Society of Chemistry journal article supplement (doi:10.1039/d2tb02191a), 2022-11-28
Supplement: d2tb02191a1.pdf [file d2tb02191a1.pdf]

## Supplementary Information

### **Fabricating biodegradable calcium phosphate/calcium sulfate cement reinforced with cellulose: in vitro and in vivo studies**

Xiao-Dan Li<sup>a</sup>, Da-Wei Yan<sup>a</sup>, Hao-Hao Ren<sup>a</sup>, Qi-Yi Zhang<sup>b\*</sup>, and Yong-Gang Yan<sup>a\*</sup>

<sup>a</sup>College of Physics, Sichuan University, Chengdu, Sichuan, 610064, China

<sup>b</sup>School of Chemical Engineering, Sichuan University, Chengdu, Sichuan 610065, China

\*Correspondence: Yong-Gang Yan and Qi-Yi Zhang

Email: [yanyonggang@scu.edu.cn](mailto:yanyonggang@scu.edu.cn) (Yong-Gang Yan) and [qyzhang-scu@163.com](mailto:qyzhang-scu@163.com) (Qi-Yi Zhang)

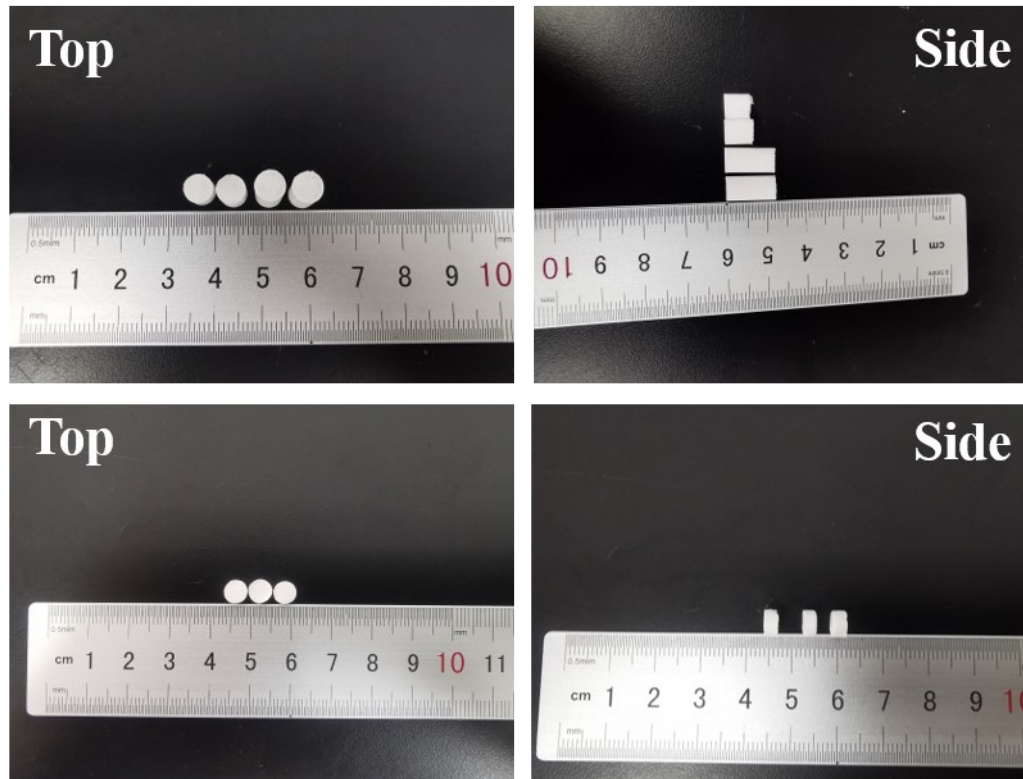

**Fig. S1. The dimension of CMC/OPC composite bone cement**

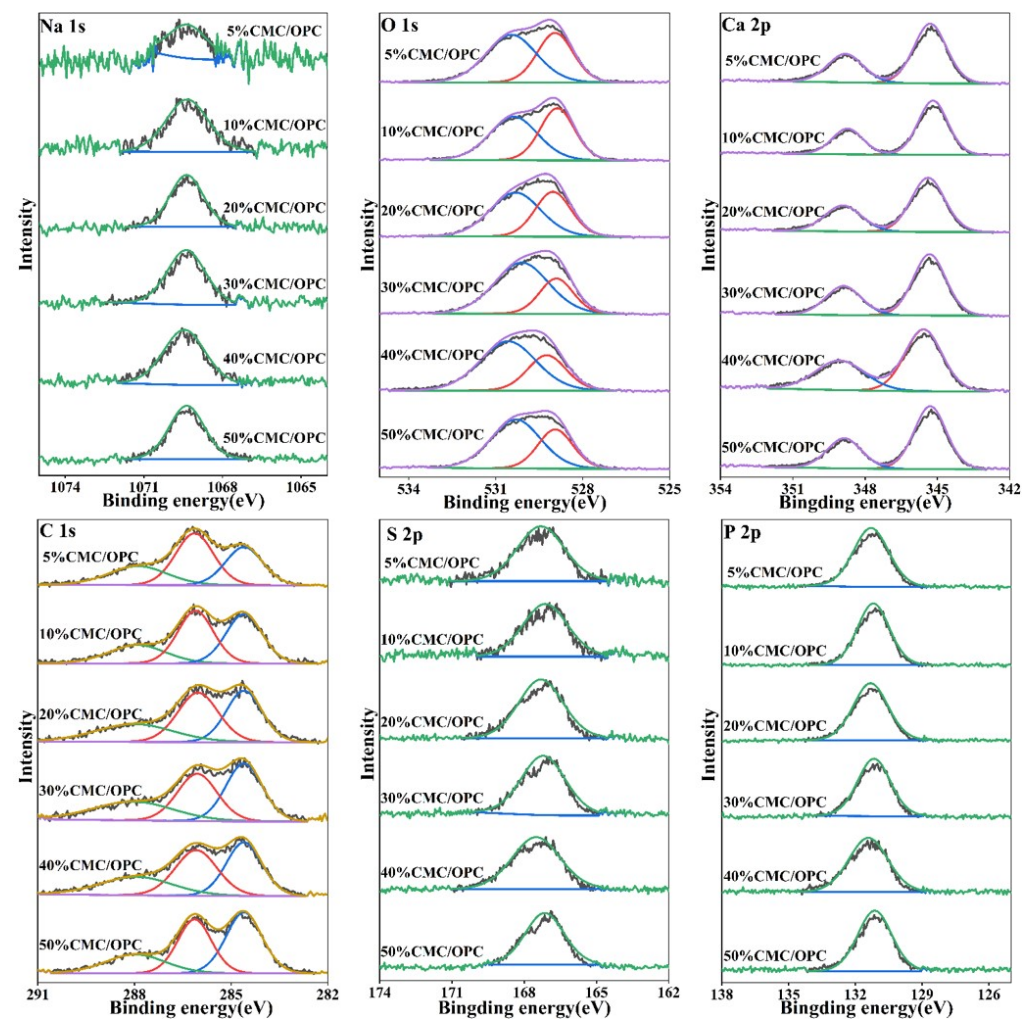

Fig. S2. XPS of composite bone cement for 5-50% CMC/OPC.

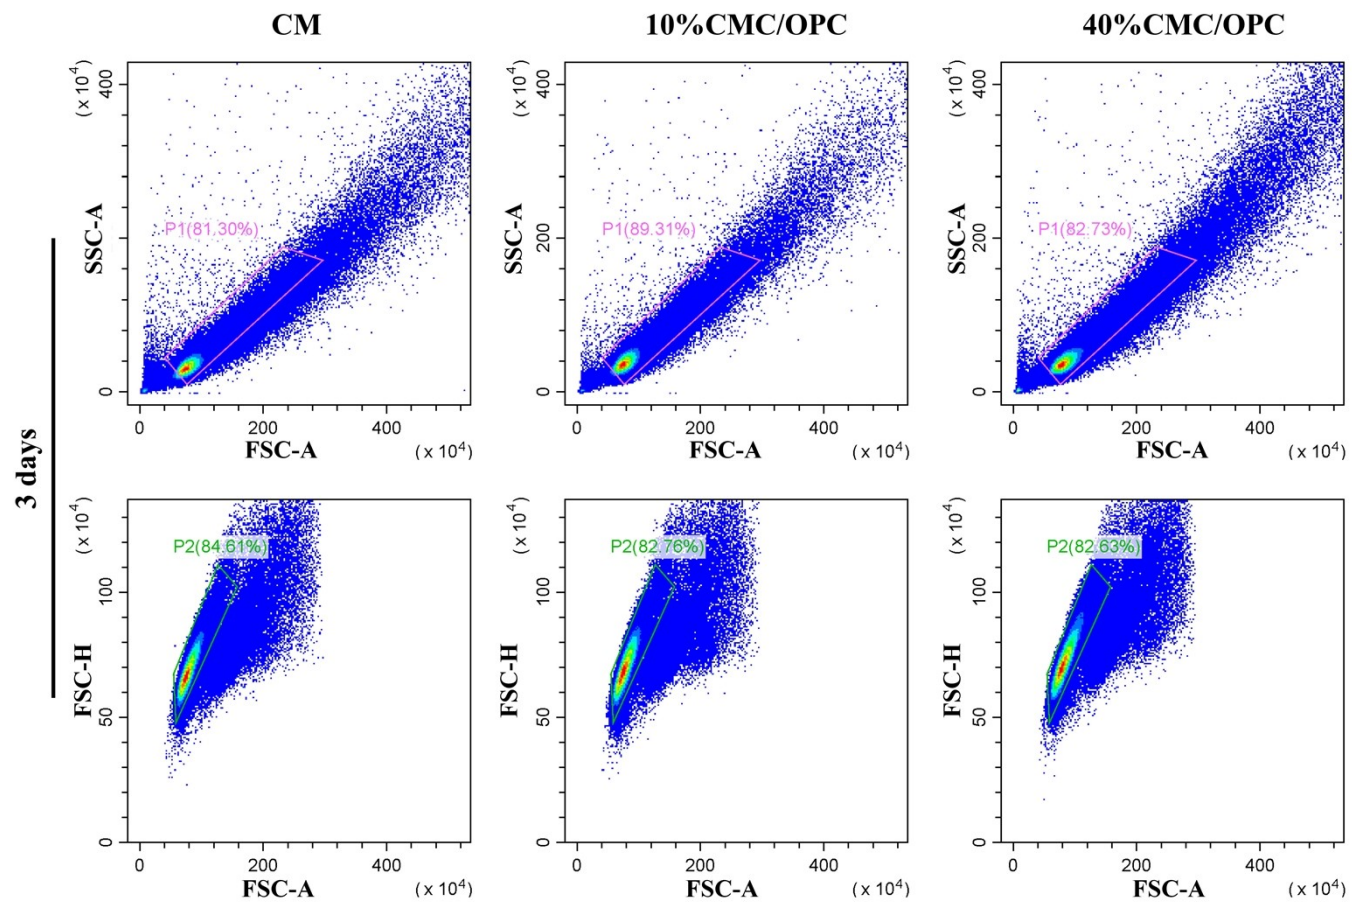

**Fig. S3. Flow cytometry data analysis.**

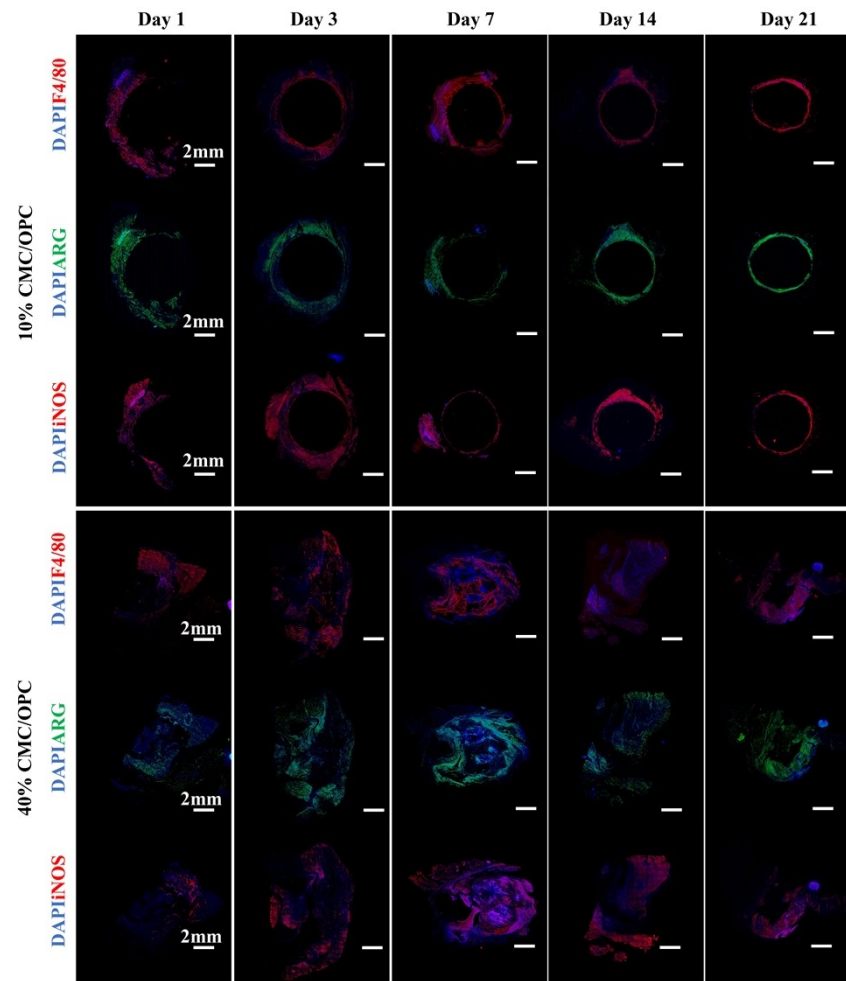

**Fig. S4. Representative immunostainings of F4/80<sup>+</sup>, ARG<sup>+</sup>, and iNOS<sup>+</sup> macrophages.**

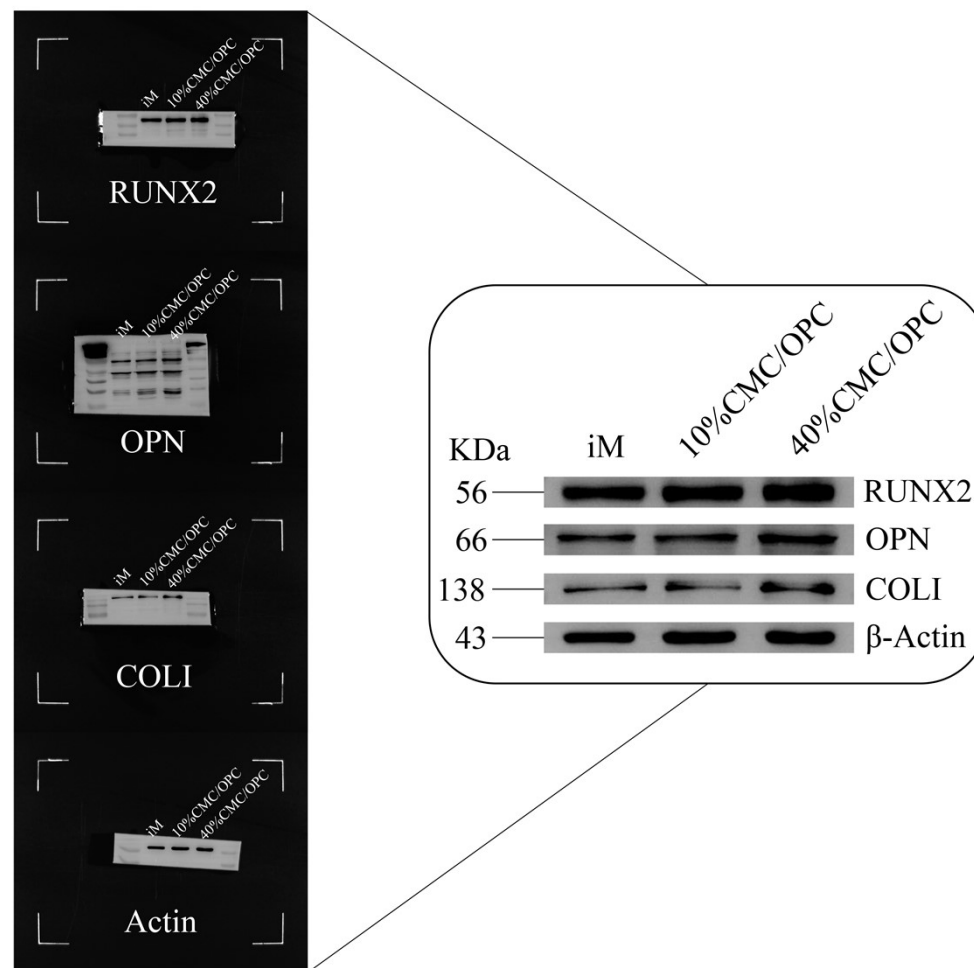

**Fig. S5. Uncropped western blot images corresponding to Fig. 4I.**

**Table S1. Primer sequences for RT-PCR**

| <b>Genes</b>                    | <b>ID</b>    | <b>Direction</b> | <b>Sequences</b>         |
|---------------------------------|--------------|------------------|--------------------------|
| <b>GAPDH</b>                    | <b>14433</b> | FORWARD          | GGTTGTCTCCTGCGACTTCA     |
|                                 |              | REVERSE          | TGGTCCAGGGTTTCTTACTCC    |
| <b>COL1</b>                     | <b>12842</b> | FORWARD          | TAAGGGTCCCCAATGGTGAGA    |
|                                 |              | REVERSE          | GGGTCCCTCGACTCCTACAT     |
| <b>Runx2</b>                    | <b>12393</b> | FORWARD          | CCTTCAAGGTTGTAGCCCTC     |
|                                 |              | REVERSE          | GGAGTAGTTCTCATCATTCCCG   |
| <b>OPN</b>                      | <b>20750</b> | FORWARD          | AAACACACAGACTTGAGCATTG   |
|                                 |              | REVERSE          | TTAGGGTCTAGGACTAGCTTGT   |
| <b><math>\beta</math>-Actin</b> | <b>11461</b> | FORWARD          | GTGCTATGTTGCTCTAGACTTCG  |
|                                 |              | REVERSE          | ATGCCACAGGATTCCATACC     |
| <b>iNOS</b>                     | <b>18126</b> | FORWARD          | ACTCAGCCAAGCCCTCACCTAC   |
|                                 |              | REVERSE          | TCCAATCTCTGCCTATCCGTCTCG |
| <b>ARG</b>                      | <b>11846</b> | FORWARD          | CATATCTGCCAAAGACATCGTG   |
|                                 |              | REVERSE          | GACATCAAAGCTCAGGTGAATC   |

**Table S2. Atomic percentages of different elements for the red rectangular region in Fig. 1C**

|          | 5%CMC/OPC         | 10%CMC/OPC         | 20%CMC/OPC        | 30%CMC/OPC         | 40%CMC/OPC          | 50%CMC/OPC |
|----------|-------------------|--------------------|-------------------|--------------------|---------------------|------------|
| Elements | CaSO <sub>4</sub> | CaHPO <sub>4</sub> | CaSO <sub>4</sub> | CaHPO <sub>4</sub> | Ca(OH) <sub>2</sub> | CMC        |
| C        | 17.96             | 15.00              | 20.64             | 21.68              | 19.93               | 46.90      |
| O        | 61.87             | 58.88              | 55.83             | 61.92              | 57.55               | 37.45      |
| Na       | 0.05              | 0.89               | 0.21              | 1.44               | 0.49                | 4.47       |
| P        | 2.26              | 12.52              | 1.07              | 7.12               | 2.02                | 4.20       |
| S        | 7.54              | 0.32               | 9.88              | 0.68               | 1.46                | 0.44       |
| Ca       | 10.33             | 12.39              | 12.38             | 7.17               | 18.55               | 6.55       |

**Table S3. Binding energy position of Na 1s, Ca 2p, P 2p, S 2p, O 1s, and C 1s for 5-50%CMC/OPC.**

| Sets       | Na 1s   | O 1s   | Ca 2p  |        | C 1s   |        | P 2p   | S 2p   |        |        |
|------------|---------|--------|--------|--------|--------|--------|--------|--------|--------|--------|
| 5%CMC/OPC  | 1069.65 | 530.46 | 528.95 | 348.82 | 345.30 | 287.89 | 286.14 | 284.60 | 131.30 | 167.31 |
| 10%CMC/OPC | 1069.35 | 530.38 | 528.88 | 348.73 | 345.18 | 287.91 | 286.10 | 284.60 | 131.19 | 167.13 |
| 20%CMC/OPC | 1069.37 | 530.32 | 529.02 | 348.92 | 345.39 | 288.00 | 286.03 | 284.60 | 131.32 | 167.31 |
| 30%CMC/OPC | 1069.38 | 530.11 | 528.91 | 348.90 | 345.33 | 288.04 | 286.05 | 284.60 | 131.16 | 167.21 |
| 40%CMC/OPC | 1069.45 | 530.57 | 529.24 | 349.05 | 345.57 | 287.94 | 286.08 | 284.60 | 131.42 | 167.51 |
| 50%CMC/OPC | 1069.36 | 530.31 | 528.95 | 348.86 | 345.30 | 287.98 | 286.14 | 284.60 | 131.13 | 167.15 |



**Table S4. Anti-washout properties of CMC/OPC cement.**

| Sets       | Anti-washout (%) |
|------------|------------------|
| 5%CMC/OPC  | 0.96 ± 0.42      |
| 10%CMC/OPC | 1.07 ± 0.36      |
| 20%CMC/OPC | 2.00 ± 0.30      |
| 30%CMC/OPC | 2.54 ± 1.06      |
| 40%CMC/OPC | 3.14 ± 0.80      |
| 50%CMC/OPC | 1.95 ± 0.59      |

**Table S5. Atomic percentages of different elements for the red rectangular region in Fig. 3D.**

| elements | 5%CMC/OPC | 10%CMC/OPC | 20%CMC/OPC | 30%CMC/OPC | 40%CMC/OPC | 50%CMC/OPC |
|----------|-----------|------------|------------|------------|------------|------------|
| P        | 39.19     | 42.76      | 41.15      | 41.59      | 40.74      | 41.35      |
| Ca       | 60.81     | 57.24      | 58.85      | 58.41      | 59.26      | 58.65      |
| Ca/P     | 1.55      | 1.34       | 1.43       | 1.40       | 1.45       | 1.42       |
